# Supplementary material
Source: PubMed Central journal article supplement (PMC10807433)
Supplement: aem.01019-23-s0001.pdf [file aem.01019-23-s0001.pdf]

## **Supplementary Materials**

### **Lactate Cross-Feeding between *Bifidobacterium* species and *Megasphaera indica* Contributes to Butyrate Formation in the Human Colonic Environment**

Sainan Zhao<sup>a</sup>, Raymond Lau<sup>a</sup>, Yang Zhong<sup>a,b</sup>, Ming-Hsu Chen<sup>a,c#</sup>

<sup>a</sup>School of Chemical and Biomedical Engineering, Nanyang Technological University, Singapore

<sup>b</sup>Department of Clinical Translational Research, Singapore General Hospital, Singapore

<sup>c</sup>Institute of Food Science and Technology, National Taiwan University, Taiwan

## Supplementary Tables

Table S1. Pairwise average nucleotide identity (ANI) values among *Bifidobacterium* and *Megasphaera* strains.

| Bacterial isolate                          | Type strain                                                                                         | ANI value (%)      |
|--------------------------------------------|-----------------------------------------------------------------------------------------------------|--------------------|
| OTU10_Megasphaera_unidentified_BWX         | Megasphaera sp. NH10--GCA_000417505.1                                                               | 99.09 <sup>1</sup> |
| OTU10_Megasphaera_unidentified_BWX         | Megasphaera sp. BL7--GCA_000417525.1                                                                | 99.03 <sup>1</sup> |
| OTU10_Megasphaera_unidentified_BWX         | Megasphaera_elsdenii--GCF_003010495.1                                                               | 90.89 <sup>2</sup> |
| OTU10_Megasphaera_unidentified_BWX         | Megasphaera_massiliensis--GCF_000455225.1                                                           | 82.43 <sup>2</sup> |
| OTU10_Megasphaera_unidentified_BWX         | Megasphaera_cerevisiae--GCF_001045675.1                                                             | 78.19 <sup>2</sup> |
| OTU10_Megasphaera_unidentified_BWX         | Megasphaera_paucivorans--GCF_900103535.1                                                            | 77.35 <sup>2</sup> |
| OTU10_Megasphaera_unidentified_BWX         | Megasphaera_micronuciformis--GCF_000165735.1                                                        | 77.34 <sup>2</sup> |
| OTU2_Bifidobacterium_pseudocatenulatum_BWX | Bifidobacterium_pseudocatenulatum--GCF_001025215.1<br>(Bifidobacterium_pseudocatenulatum DSM 20438) | 98.17 <sup>2</sup> |
| OTU2_Bifidobacterium_pseudocatenulatum_BWX | Bifidobacterium_kashiwanohense--GCF_000800455.1                                                     | 92.03 <sup>2</sup> |
| OTU2_Bifidobacterium_pseudocatenulatum_BWX | Bifidobacterium_catenulatum--GCF_001025195.1                                                        | 91.59 <sup>2</sup> |
| OTU2_Bifidobacterium_pseudocatenulatum_BWX | Bifidobacterium_adolescentis--GCF_000010425.1                                                       | 84.47 <sup>2</sup> |
| OTU2_Bifidobacterium_pseudocatenulatum_BWX | Bifidobacterium_ruminantium--GCF_000770925.1                                                        | 83.03 <sup>2</sup> |
| OTU2_Bifidobacterium_pseudocatenulatum_BWX | Bifidobacterium_dentium--GCF_001042595.1                                                            | 82.57 <sup>2</sup> |
| OTU2_Bifidobacterium_pseudocatenulatum_BWX | Bifidobacterium_moukalabense--GCF_000522505.1                                                       | 82.56 <sup>2</sup> |
| OTU13_Bifidobacterium_longum_BWX           | Bifidobacterium_longum--GCF_000196555.1<br>(Bifidobacterium_longum subsp. longum JCM 1217)          | 98.83 <sup>2</sup> |
| OTU13_Bifidobacterium_longum_BWX           | Bifidobacterium_breve--GCF_001025175.1                                                              | 86.84 <sup>2</sup> |
| OTU13_Bifidobacterium_longum_BWX           | Bifidobacterium_reuteri--GCF_000741695.1                                                            | 83.25 <sup>2</sup> |
| OTU13_Bifidobacterium_longum_BWX           | Bifidobacterium_saguini--GCF_000741715.1                                                            | 82.66 <sup>2</sup> |
| OTU13_Bifidobacterium_longum_BWX           | Bifidobacterium_scardovii--GCF_001042635.1                                                          | 82.19 <sup>2</sup> |
| OTU13_Bifidobacterium_longum_BWX           | Bifidobacterium_aesculapii--GCF_001417815.1                                                         | 82.18 <sup>2</sup> |
| OTU13_Bifidobacterium_longum_BWX           | Bifidobacterium_stellenboschense--GCF_000741785.1                                                   | 82.14 <sup>2</sup> |

<sup>1</sup> Values were obtained through comparing genome sequences using the OrthoANI tool (<https://www.ezbiocloud.net/tools/ani>).

<sup>2</sup> Values were generated from the Protologger webserver ([www.protologger.de](http://www.protologger.de)).

Table S2. Composition of FBVA medium.

| Component                                    | Composition (per liter) |
|----------------------------------------------|-------------------------|
| NaCl                                         | 0.47 g                  |
| HN <sub>a</sub> PO <sub>4</sub>              | 3.46 g                  |
| H <sub>2</sub> NaPO <sub>4</sub>             | 1.87 g                  |
| Na <sub>2</sub> SO <sub>4</sub>              | 0.1 g                   |
| KCl                                          | 0.45 g                  |
| Urea                                         | 0.20 g                  |
| NH <sub>4</sub> Cl                           | 0.36 g                  |
| resazurin                                    | 1 mg                    |
| cysteine-HCl                                 | 0.25 g                  |
| CaCl <sub>2</sub> · 2H <sub>2</sub> O        | 72.8 mg                 |
| MgCl <sub>2</sub> · 6H <sub>2</sub> O        | 100 mg                  |
| P1 metal stock solution <sup>1</sup>         | 1 mL                    |
| ATCC vitamin stock (ATCC MD-VS, Hampton, NH) | 10 mL                   |
| Amino acid mixture <sup>2</sup>              | 10 mL                   |

<sup>1</sup> P1 metal stock solution (per liter) is composed of 34.26 g H<sub>3</sub>BO<sub>3</sub>, 4.32 g MnCl<sub>2</sub>·4H<sub>2</sub>O, 315 mg ZnCl<sub>2</sub>, 44 mg Na<sub>2</sub>MoO<sub>4</sub>·2H<sub>2</sub>O, 3 mg CuSO<sub>4</sub>·5H<sub>2</sub>O, 12.15 mg CoCl<sub>2</sub>·6H<sub>2</sub>O, 259 mg NiCl<sub>2</sub>, 0.28 mL EDTA (10 mM), and 1 mL FeCl<sub>3</sub>·6H<sub>2</sub>O (3.89 mg/mL in 0.1 M HCl).

<sup>2</sup> The amino acid mixture consisted of all 20 amino acids (1 mM each).

## Supplementary Figures

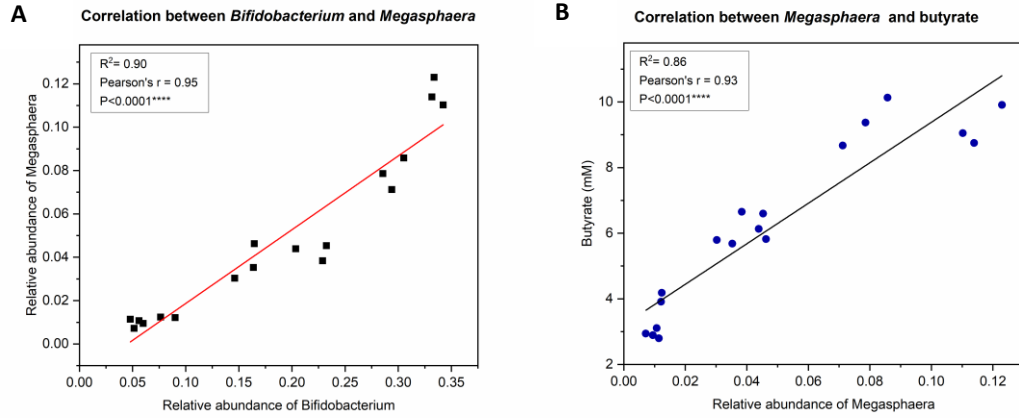

Fig. S1. Correlations between the relative abundance of the genera *Bifidobacterium* and *Megasphaera* in BWX30-based fecal fermentation cultures (A). Correlations between the relative abundance of *Megasphaera* and butyrate yields.

A Tree scale: 0.1

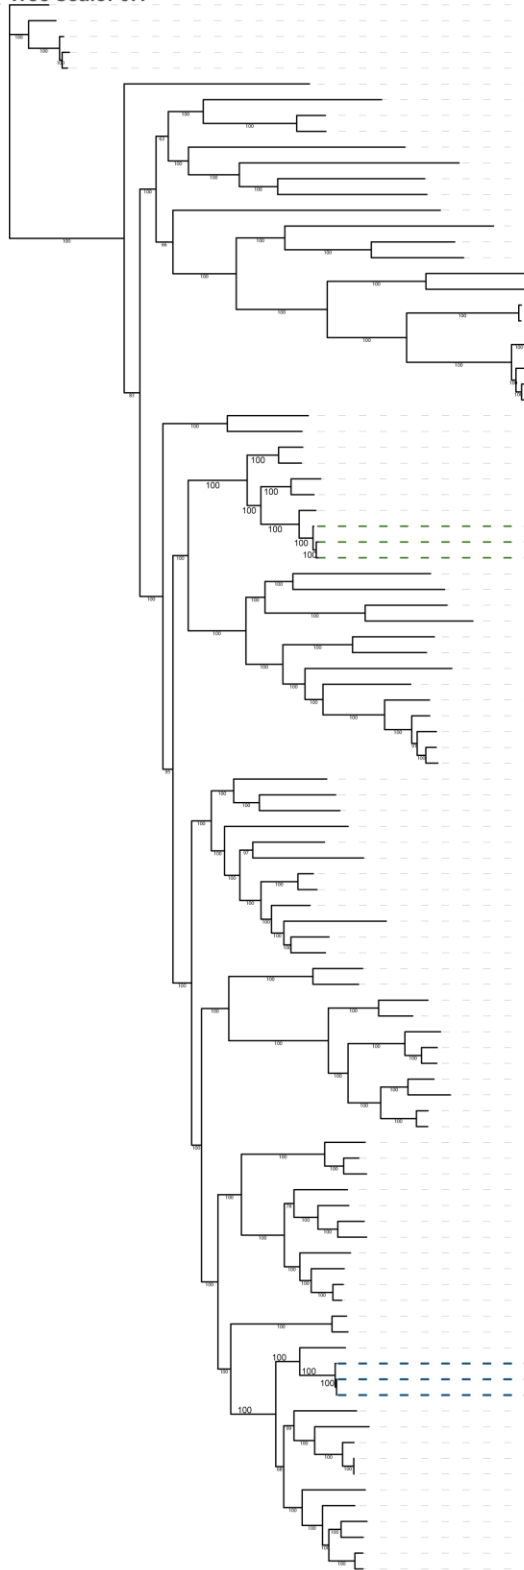

- Bifidobacterium boum strain LMG 10736
- Bifidobacterium apri strain DSM 100238
- Bifidobacterium thermacidophilum subsp. porcinum DSM 17755
- Bifidobacterium thermacidophilum subsp. thermacidophilum DSM 15837
- Bifidobacterium thermophilum strain 1543B
- Bifidobacterium tsurumiense DSM 17777
- Bifidobacterium mongoliense strain BMONG18
- Bifidobacterium subtile strain KCTC 3272
- Bifidobacterium sp. TMW21764 strain TMW 2.1764
- Bifidobacterium sp. XV10
- Bifidobacterium bombi DSM 19703
- Bifidobacterium commune strain R-52791
- Bifidobacterium bohemicum strain R-53250
- Bifidobacterium minimum DSM 20102
- Bifidobacterium aquikefiri strain LMG 28769
- Bifidobacterium psychraerophilum DSM 22366
- Bifidobacterium crudilactis strain LMG 23609
- Bifidobacterium sp. XV2
- Bifidobacterium actinocoloniiforme DSM 22766
- Bifidobacterium coryneforme DSM 20216
- Bifidobacterium indicum LMG 11587 = DSM 20214
- Bifidobacterium asteroides PRL2011
- Bifidobacterium asteroides DSM 20089
- Bifidobacterium sp. B14384H11
- Bifidobacterium sp. S053-2
- Bifidobacterium sp. M0109
- Bifidobacterium sp. 6T3
- Bifidobacterium pullorum strain LMG 21816
- Bifidobacterium moukalabense strain GB62
- Bifidobacterium dentium ATCC 27678
- Bifidobacterium ruminantium strain MSK 5.20
- Bifidobacterium adolescentis ATCC 15703
- Bifidobacterium catenulatum DSM 16992 = JCM 1194 = LMG 11043
- Bifidobacterium pseudocatenulatum DSM 20438 = JCM 1200 = LMG 10505
- OTU2 Bifidobacterium pseudocatenulatum\_BWX**
- Bifidobacterium pseudocatenulatum YIT11027
- Bifidobacterium sp. BRDM6
- Bifidobacterium magnum DSM 20222
- Bifidobacterium gallicum DSM 20093 = LMG 11596
- Bifidobacterium sp. 2036B
- Bifidobacterium animalis subsp. lactis BLC1
- Bifidobacterium sp. GSD1FS
- Bifidobacterium cuniculi strain LMG 10738
- Bifidobacterium pseudolongum strain UMB-MBP-01
- Bifidobacterium sp. 71
- Bifidobacterium anseris Goo31D
- Bifidobacterium choerinum strain FMB-1
- Bifidobacterium sp. 70
- Bifidobacterium sp. 2020B
- Bifidobacterium sp. 2034B
- Bifidobacterium bifidum NCIMB 41171
- Bifidobacterium sp. LMG 31471
- Bifidobacterium jacchi strain MRM 9.3
- Bifidobacterium scardovii JCM 12489 = DSM 13734
- Bifidobacterium sp. 2033B
- Bifidobacterium sp. 82T10
- Bifidobacterium biavatii DSM 23969
- Bifidobacterium ramosum strain DSM 100688
- Bifidobacterium hapali strain DSM 100202
- Bifidobacterium aerophilum strain TRE17
- Bifidobacterium sp. 81T8
- Bifidobacterium vespertilionis strain RST16
- Bifidobacterium avesanii strain DSM 100685
- Bifidobacterium margollesii Uis1B
- Bifidobacterium sp. TRI 7
- Bifidobacterium tissieri strain DSM 100201
- Bifidobacterium sp. Tam10B
- Bifidobacterium sp. 2028B
- Bifidobacterium sp. 82T24
- Bifidobacterium catulorum strain MRM 8.19
- Bifidobacterium sp. TRE 1
- Bifidobacterium sp. SMA1
- Bifidobacterium angulatum DSM 20098 = JCM 7096
- Bifidobacterium merycicum DSM 6492
- Bifidobacterium sp. 64T4
- Bifidobacterium sp. 79T10
- Bifidobacterium sp. MA2
- Bifidobacterium roussetti strain RST9
- Bifidobacterium callitrichos strain RST27
- Bifidobacterium aesculapii strain DSM 26737T
- Bifidobacterium sp. SMA15
- Bifidobacterium stellenboschense strain DSM 23968
- Bifidobacterium parmae Uis4E
- Bifidobacterium eulemuris strain DSM 100216
- Bifidobacterium lemumum strain DSM 28807
- Bifidobacterium breve JCM 7017
- OTU13 Bifidobacterium longum\_BWX**
- Bifidobacterium longum strain NCTC11818
- Bifidobacterium longum subsp. longum JCM 1217
- Bifidobacterium sp. TRE D
- Bifidobacterium myosotis strain DSM 100196
- Bifidobacterium callitrichidarum strain TRI 5
- Bifidobacterium sp. MA1
- Bifidobacterium sp. 82T25
- Bifidobacterium reuteri DSM 23975
- Bifidobacterium sp. LC6
- Bifidobacterium sp. LMG 31469
- Bifidobacterium sp. TRE H
- Bifidobacterium saguini strain DSMZ 23967
- Bifidobacterium imperatoris strain JCM 32708

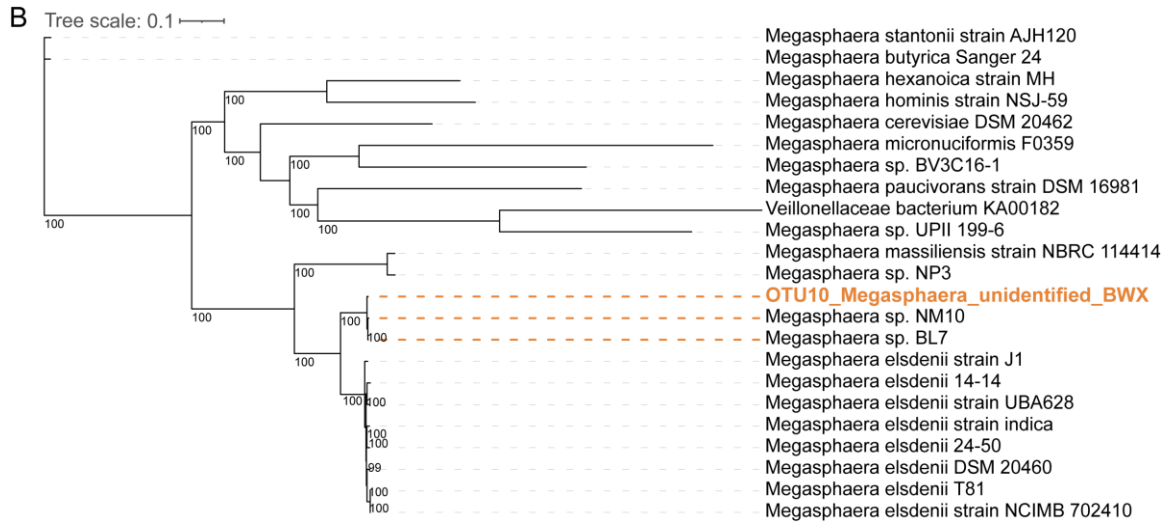

C

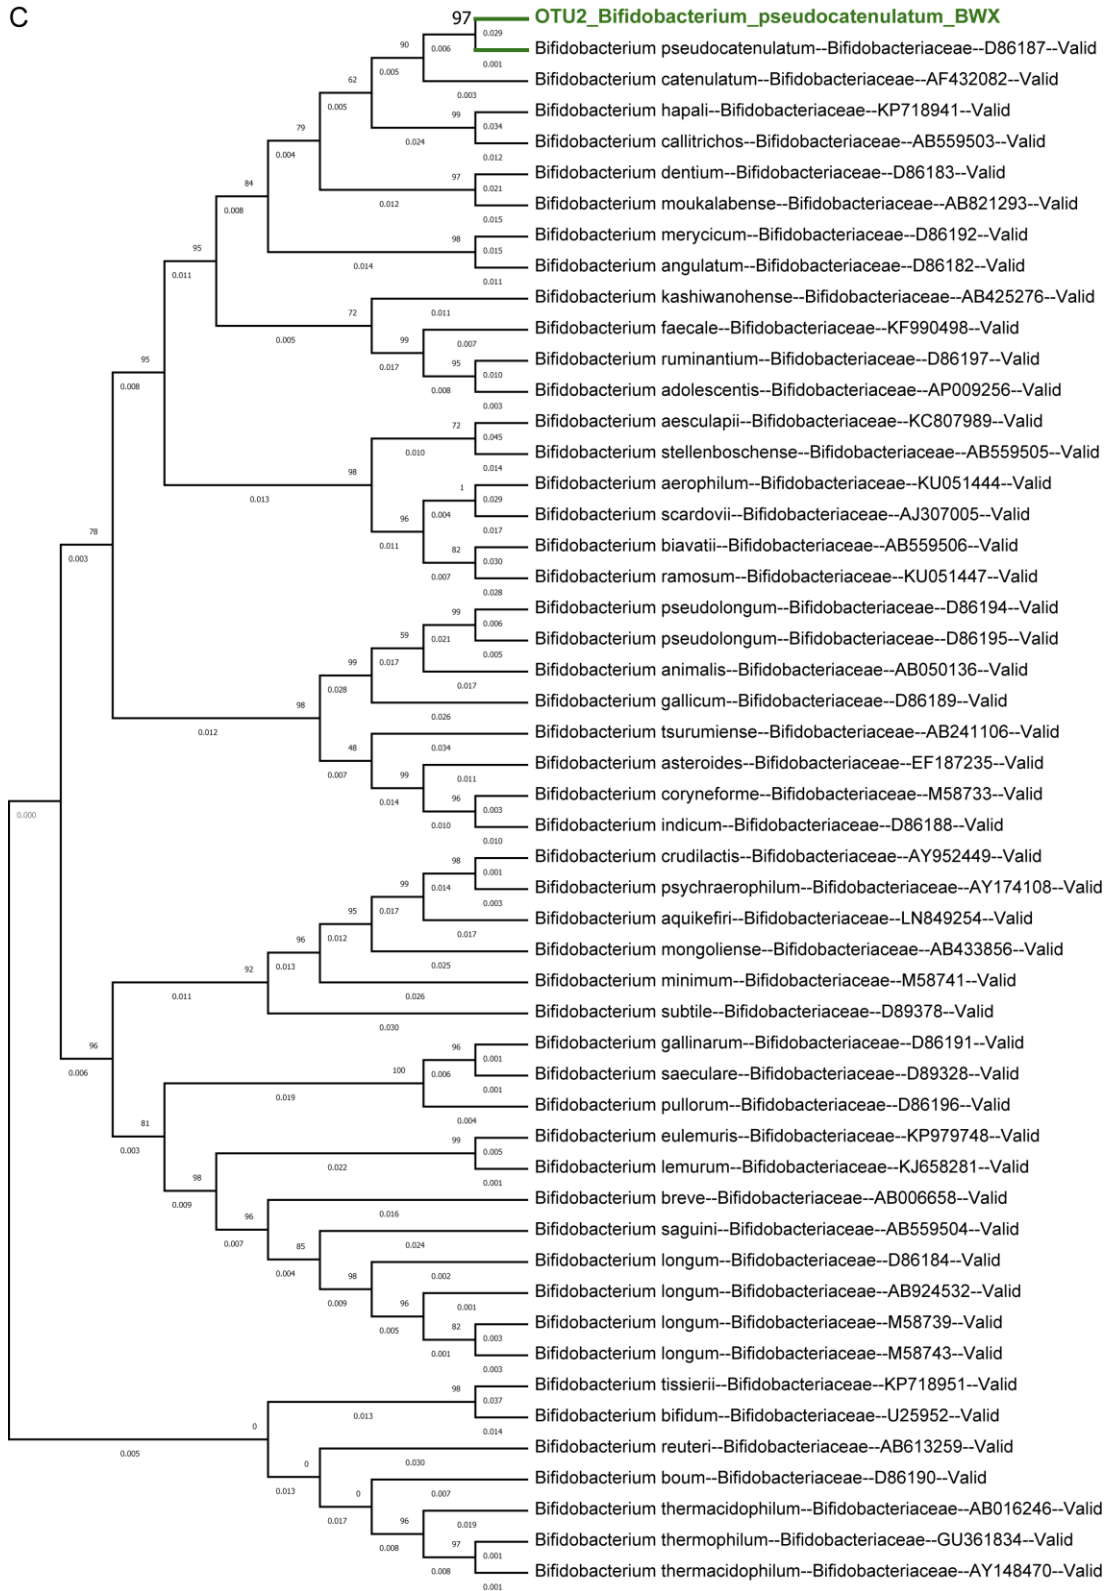

D

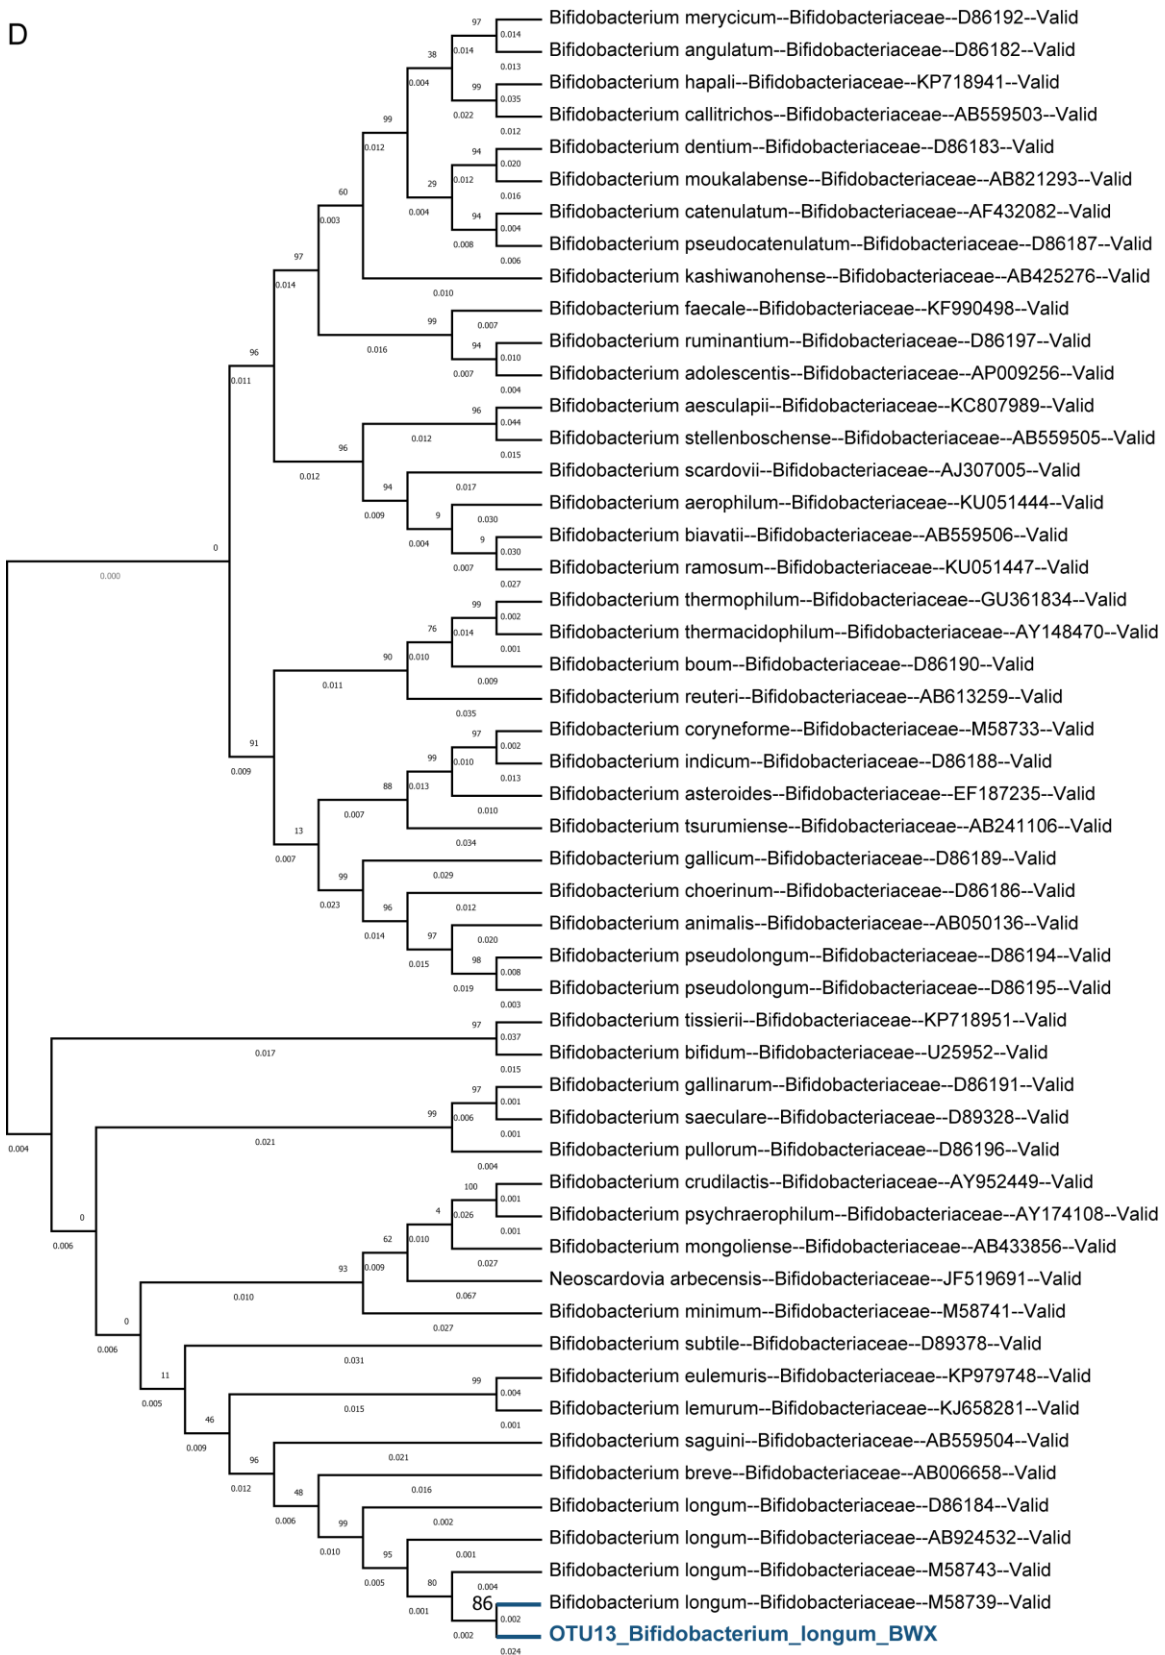



E

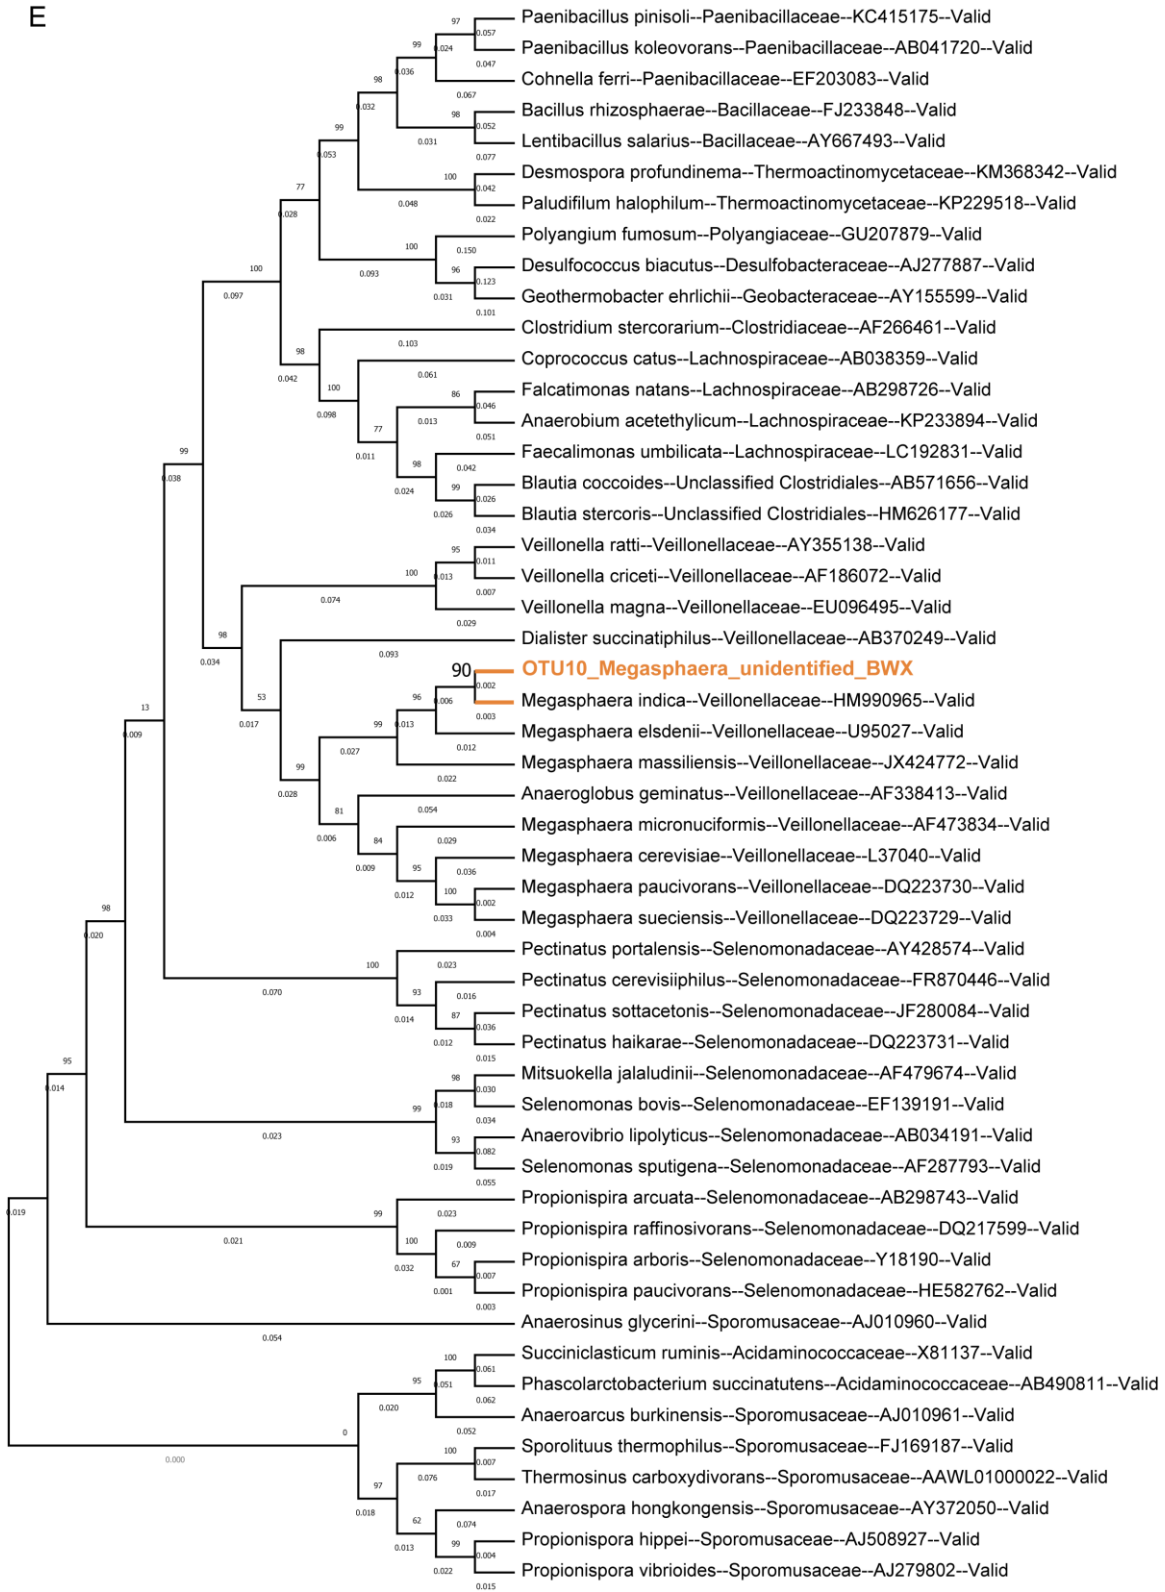

Fig. S2. Phylogenetic trees depicting the evolutionary relationships among species. (A) Codon tree of genus *Bifidobacterium* based on 160 core genes. (B) Codon tree of genus *Megasphaera* based on 375 core genes. Diagrams A & B were constructed using the BV-BRC server (<https://www.bv-brc.org/app/PhylogeneticTree>). (C) Phylogenetic tree of OTU2\_*Bifidobacterium\_pseudocatenulatum*\_BWX. (D) Phylogenetic tree of OTU13\_*Bifidobacterium\_longum*\_BWX. (E) Phylogenetic tree of OTU10\_*Megasphaera\_unidentified*\_BWX. Diagrams C, D, & E were constructed based on the 16S rRNA gene sequence using Protologger (<http://protologger.de/>).

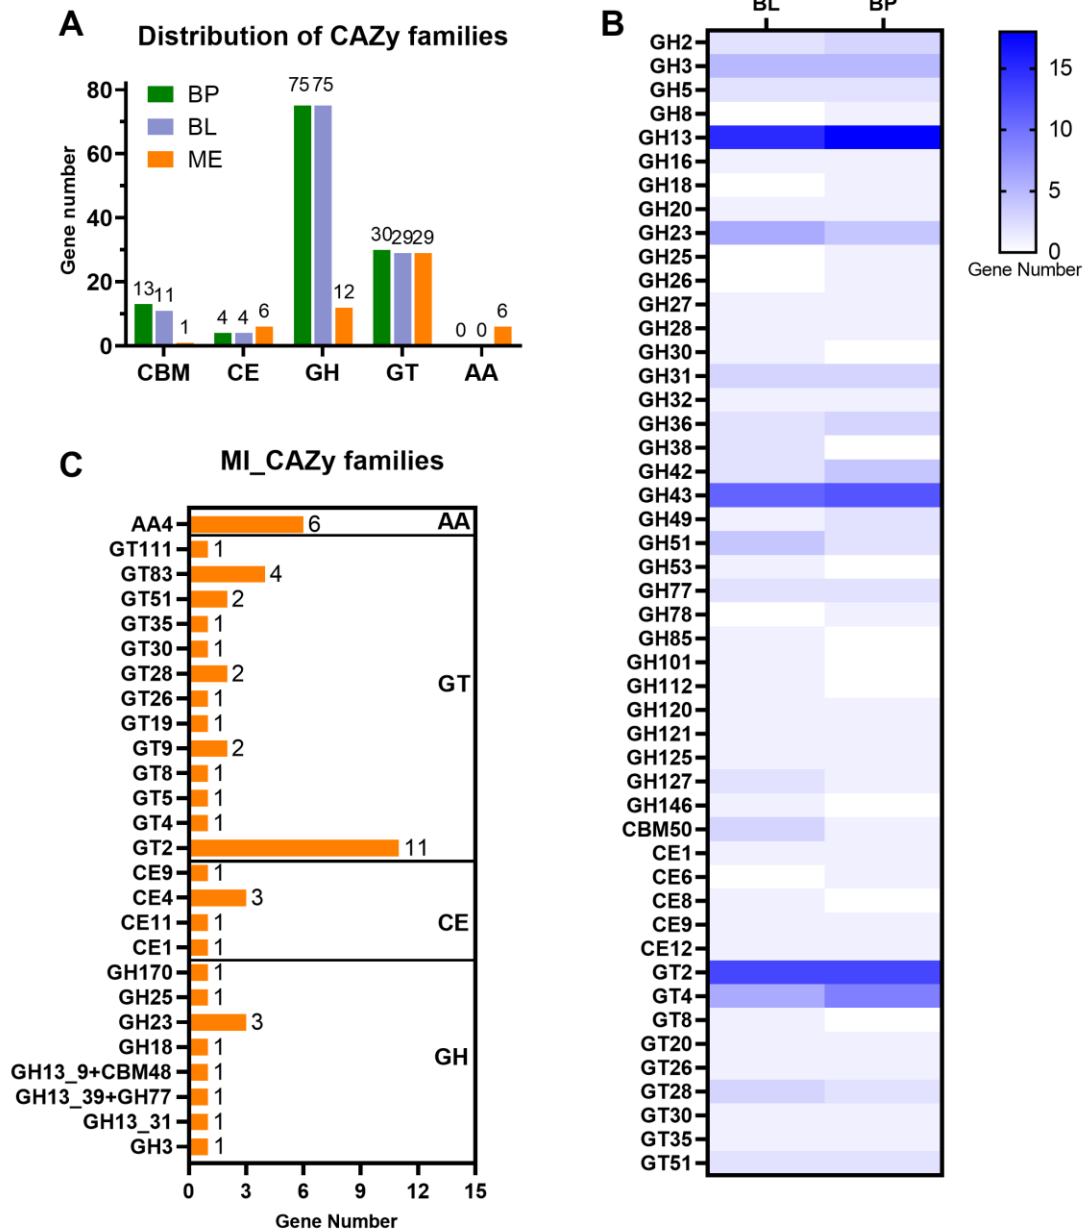

Fig. S3. Distribution of the CAZymes (Carbohydrate active enzymes) in the three bacterial genomes. CBM, carbohydrate binding module; CE, carbohydrate esters; GH, glycoside hydrolase; GT, glycoside transferase; AA, auxiliary activities family.

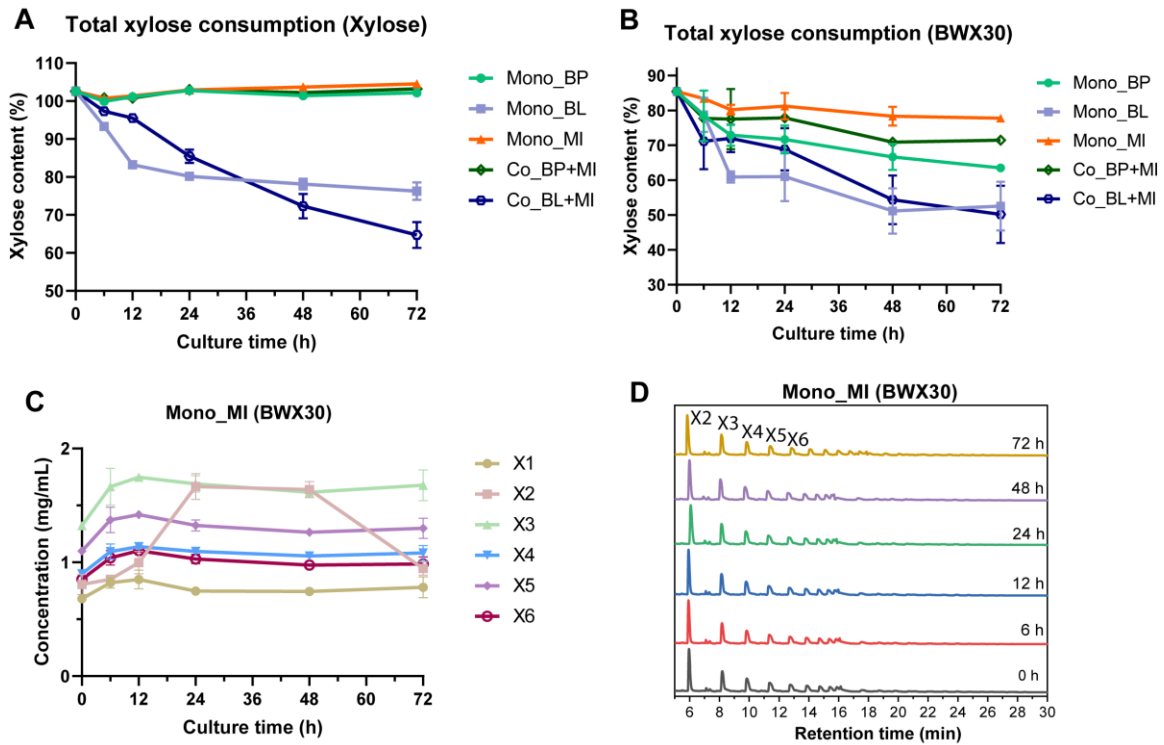

Fig. S4. Substrate consumption during monoculture and coculture fermentation. Total xylose concentration in the medium with xylose (A) or BWX30 (B) as the carbohydrate source. (C) Concentration of xylose and xylooligosaccharides in the MI fermented BWX30 medium. (D) Profile of the oligomers in medium with BWX30 as the carbohydrate source. Mono, monoculture; Co, coculture. BP, *Bifidobacterium pseudocatenulatum\_BWX*; BL, *Bifidobacterium longum\_BWX*; MI, *Megasphaera indica\_BWX*; X1, xylose; X2, xylobiose; X3, xylotriose; X4, xylotetraose; X5, xylopentaose and X6, xylohexaose. The range bars in line charts denote the standard deviation of three biological replicates.

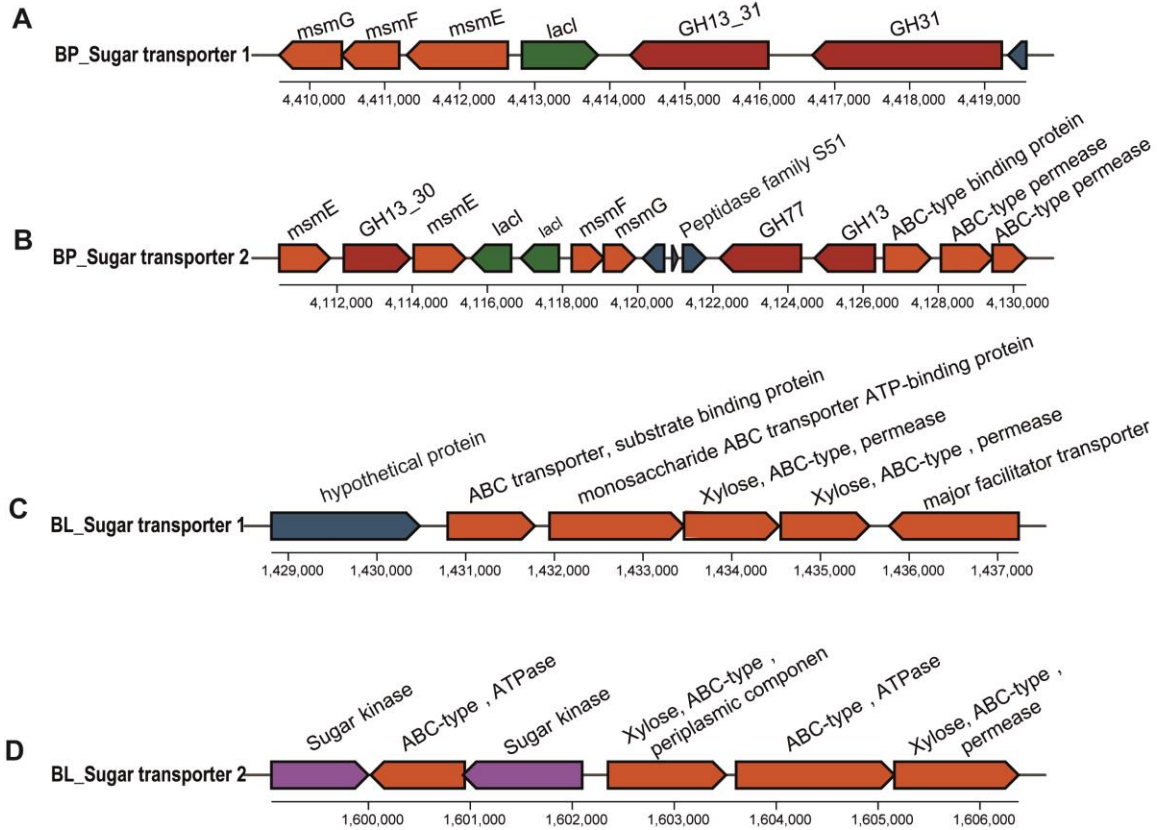

Fig. S5. Schematic representation of sugar transport system in the genome of (A-B) *Bifidobacterium pseudocatenulatum*\_BWX (BP), and (C-D) *Bifidobacterium longum*\_BWX (BL).

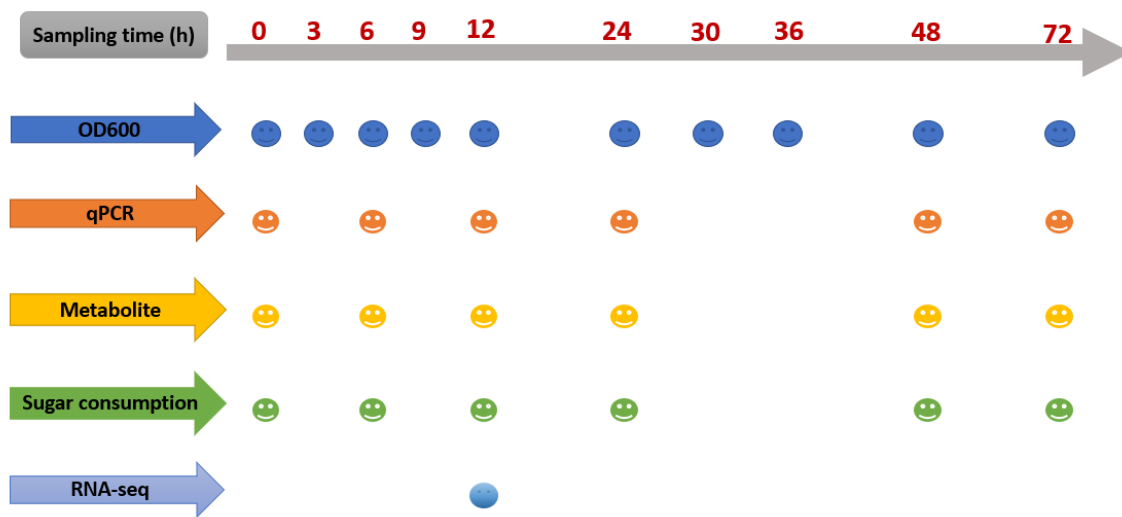

Fig. S6. Sampling time points for each analysis during the monoculture and coculture fermentations.
